# Supplementary material for: Boosting the performance of a silicon photocathode for photoelectrochemical hydrogen production by immobilization of a cobalt tetraazamacrocyclic catalyst
Source: Royal Society of Chemistry journal article supplement (doi:10.1039/d0ta09942b), 2020-11-08
Supplement: d0ta09942b1.pdf [file d0ta09942b1.pdf]

## Supporting information

### **Boosting the performance of a silicon photocathode for photoelectrochemical hydrogen production by immobilization of a cobalt tetraazamacrocyclic catalyst**

Chengming Nie, Chang Liu, Lunlun Gong and Mei Wang\*

*State Key Laboratory of Fine Chemicals, Dalian University of Technology, Dalian 116024, P. R. China. E-mail: [symbueno@dlut.edu.cn](mailto:symbueno@dlut.edu.cn)*

#### **Experimental details**

##### **Materials and instruments**

Silver nitrate (99%), pyruvic acid (99%), ammonium persulfate (99%), cobalt(II) bromide (99%), 4-bromopyridine hydrochloride (98%), methyl isonicotinate (> 98%), diethyl phosphite (99%), tetrakis(triphenylphosphine)palladium (99%), and bromotrimethylsilane (98%) were purchased from Aladdin®. 3,3'-Diaminodipropylamine (98%) was purchased from Energy Chemical. Silicon wafers (10–20  $\Omega\cdot\text{cm}$ ) were purchased from Hangzhou Bojing Science and Technology Limited Company, and titanium oxide paste ( $\text{TiO}_2$  nanoparticles, 18–20 nm, anatase, hydrophilicity) was purchased from Heptachroma company in Dalian, China. All reagents were used as received without further purification.

$^1\text{H}$  NMR spectra were measured on a Bruker Avance II 500 instrument at 298 K. Mass spectra were obtained on an MALDI Micro MX and LTQ Orbitrap XL instrument. The attenuated total reflectance fourier-transform infrared (ATR-FTIR) spectra were recorded on a Thermo Fisher Nicolet iN10 spectrometer. Field-emission scanning electron microscope (SEM) images were recorded on a Nova NanoSEM 450 instrument. X-ray photoelectron spectroscopy (XPS) spectra were obtained on an ESCALAB 250Xi (Thermo Scientific). The loading amount of the cobalt catalyst on Si/ $\text{TiO}_2$  electrode was determined by inductively coupled plasma-optical emission spectrometry (ICP-OES) (PerkinElmer 2000 DV).

### Preparation of complex Co(CR-DCP)

The 2,6-dicarboxypyridin-4-yl (DCP)-functionalized tetraazamacrocyclic cobalt(III) complex [Co(CR-DCP)Br<sub>2</sub>]Br was prepared as the procedure described in our previous report.<sup>S1</sup> Complex Co(CR-DCP) was obtained in a yield of 80–85%. MS (ESI) calcd for [M–Br]<sup>+</sup> (C<sub>22</sub>H<sub>25</sub>Br<sub>2</sub>CoN<sub>5</sub>O<sub>4</sub>): *m/z* = 641.96, found: 642.01. <sup>1</sup>H NMR (500 MHz, DMSO-*d*<sub>6</sub>): δ 13.83 (br s, 2H), 9.21 (s, 2H), 9.02 (s, 2H), 6.74 (t, *J* = 9.5 Hz, 1H), 4.24 (d, *J* = 10.8 Hz, 2H), 3.62–3.55 (m, 4H), 3.25 (t, *J* = 9.5 Hz, 2H), 3.08 (s, 6H), 2.29 (d, *J* = 12.8 Hz, 2H), 2.11 (m, 2H). <sup>13</sup>C NMR (125.8 MHz, CD<sub>3</sub>OD): δ 180.20, 166.98, 159.68, 151.27, 150.75, 148.26, 127.61, 127.23, 52.93, 51.94, 27.56, 17.99.

### Fabrication of the Si/TiO<sub>2</sub>/Co(CR-DCP) hybrid photocathode

The Si/TiO<sub>2</sub> electrode was fabricated referring to the literature procedure.<sup>S2</sup> The TiO<sub>2</sub> film was coated on the surface of the freshly treated p-Si wafer by doctor-blading of a paste of TiO<sub>2</sub> nanoparticles (18–20 nm), and then Si/TiO<sub>2</sub> was annealed following a reported controlled sintering procedure up to 450 °C under atmospheric conditions.<sup>S2</sup> Then the DCP-functionalized cobalt tetraazamacrocyclic catalyst was immobilized on the Si/TiO<sub>2</sub> electrode by immersing the electrode in the MeOH solution of the cobalt catalyst (1.0 mM) for 16 h in the dark. Afterward, the electrode was thoroughly rinsed with MeOH to remove the nonbonded catalyst molecules on the surface of the electrode. In addition, the Si/TiO<sub>2</sub>(5 nm,ALD)/Co(CR-DCP) electrode with a 5 nm TiO<sub>2</sub> film deposited by using an ALD system (YUANTEC, Ensure Scientific Group) was also fabricated with an essentially identical procedure. The amount of immobilized cobalt catalyst on Si/TiO<sub>2</sub> electrode was determined by ICP-OES analysis. The following manufacturing process for encapsulating the hybrid electrode was identical to that as described in our previous report.<sup>S3</sup>

## Photoelectrochemical measurements

All photoelectrochemical measurements were performed in a three-electrode cell under Ar at 25 °C using an electrochemical workstation (CHI 650E) with the as-fabricated Si/TiO<sub>2</sub>/Co(CR-DCP) photocathode as the working electrode (geometric area 1 cm<sup>2</sup>), a Ag/AgCl electrode as the reference electrode, and a Pt foil (1 cm<sup>2</sup>) as the counter electrode. A 300 W Xenon arc lamp (100 mW cm<sup>-2</sup>, AM 1.5G) with an optical filter ( $\lambda > 400$  nm) was employed as the light source. All experimentally measured potentials were converted to the ones versus RHE by using the following equation:  $E(\text{RHE}) = E(\text{Ag/AgCl}) + E^\ominus(\text{Ag/AgCl}) + 0.059\text{pH V}$  ( $E^\ominus(\text{Ag/AgCl}) = 0.197$  V at 25 °C).

The LSVs of Si/TiO<sub>2</sub>/Co(CR-DCP) and bare Si/TiO<sub>2</sub> were measured in 0.1 M acetate buffer at pH 4.5, or 0.1 M phosphate buffer at pH 7, or 0.1 M borate buffer at pH 9 under continuous or chopped illumination at a scan rate of 10 mV s<sup>-1</sup>. The controlled potential photoelectrolysis (CPP) experiments of Si/TiO<sub>2</sub>/Co(CR-DCP) and Si/TiO<sub>2</sub> electrodes were conducted at 0 V vs RHE in 0.1 M acetate buffer at pH 4.5 with 2 min dark chop every hour of illumination. The amount of evolved H<sub>2</sub> in the headspace of the sealed gas-tight cell was analyzed by a gas chromatograph (GC, Cealight GC-7920) equipped with a 5 Å molecular sieve column (2 mm × 2 m) during CPP experiments. The faradaic efficiencies were determined from the CPP experiments at 0 V over 2 h of illumination. The IPCE values of Si/TiO<sub>2</sub>/Co(CR-DCP) were measured on a Zahner photoelectrochemical workstation (CIMPS-2) under illumination from a LED lamp (TLS03) with a wavelength scan range from 365 to 1020 nm.

The electrochemical impedance spectra (EIS) were measured at zero bias in 0.1 M acetate buffer at pH 4.5 under illumination with the sweeping frequency from 100 kHz to 0.1 Hz and a 5 mV amplitude using a potentiostat (CHI650E). The intensity modulated photocurrent spectra (IMPS) were conducted on a Zahner photoelectrochemical workstation (CIMPS-2). Intensity-modulated light was provided by a white light-emitting diode with an intensity of 100 mW cm<sup>-2</sup>.

The superimposition of sinusoidal modulation of light-emitting diode was 10% and the modulation amplitude voltage was 2 mV. IMPS data was collected over the 10 kHz to 0.1 Hz frequency range at different applied potentials.

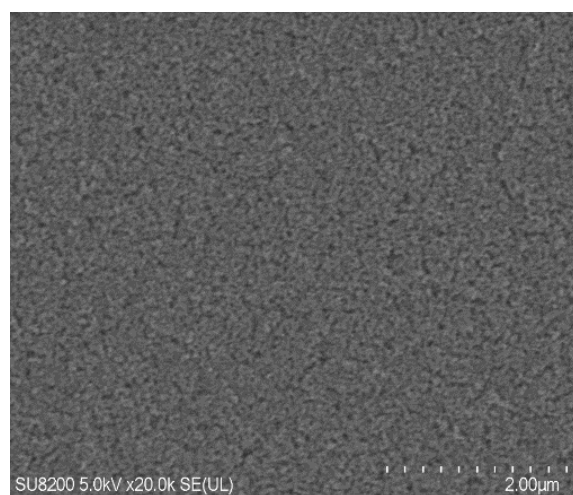

**Fig. S1** Top-view SEM image of the Si/TiO<sub>2</sub> electrode.

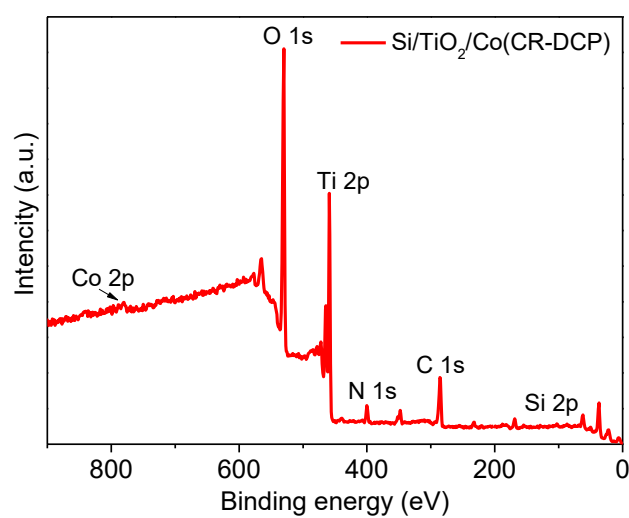

**Fig. S2** X-ray photoelectron spectroscopy (XPS) survey of the as-prepared Si/TiO<sub>2</sub>/Co(CR-DCP) electrode.

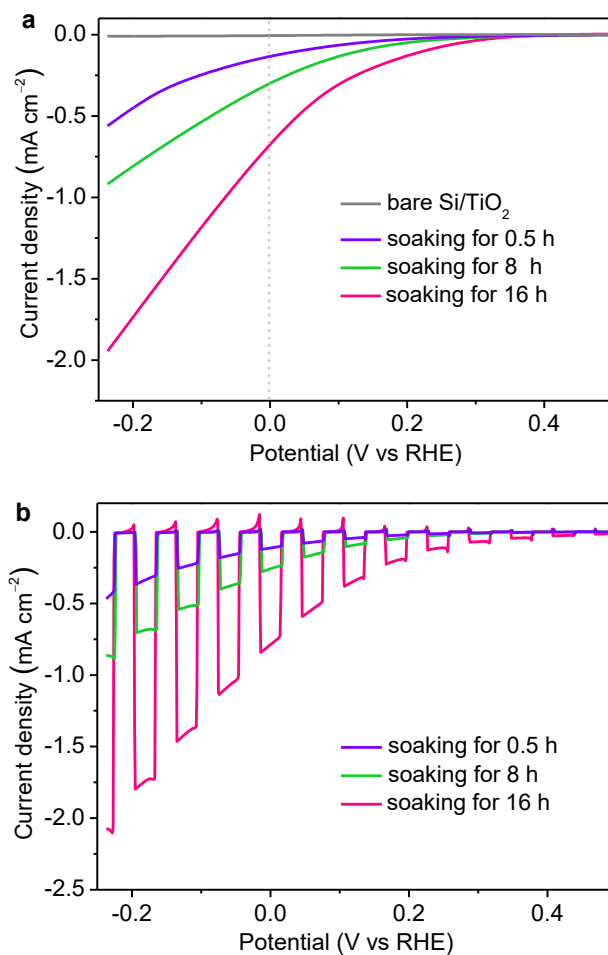

**Fig. S3** LSVs of the Si/TiO<sub>2</sub>/Co(CR-DCP) photocathodes prepared with varying soaking time and bare Si/TiO<sub>2</sub> in 0.1 M acetate buffer at pH 4.5 under (a) continuous and (b) chopped illumination, at a scan rate of 10 mV s<sup>-1</sup>.

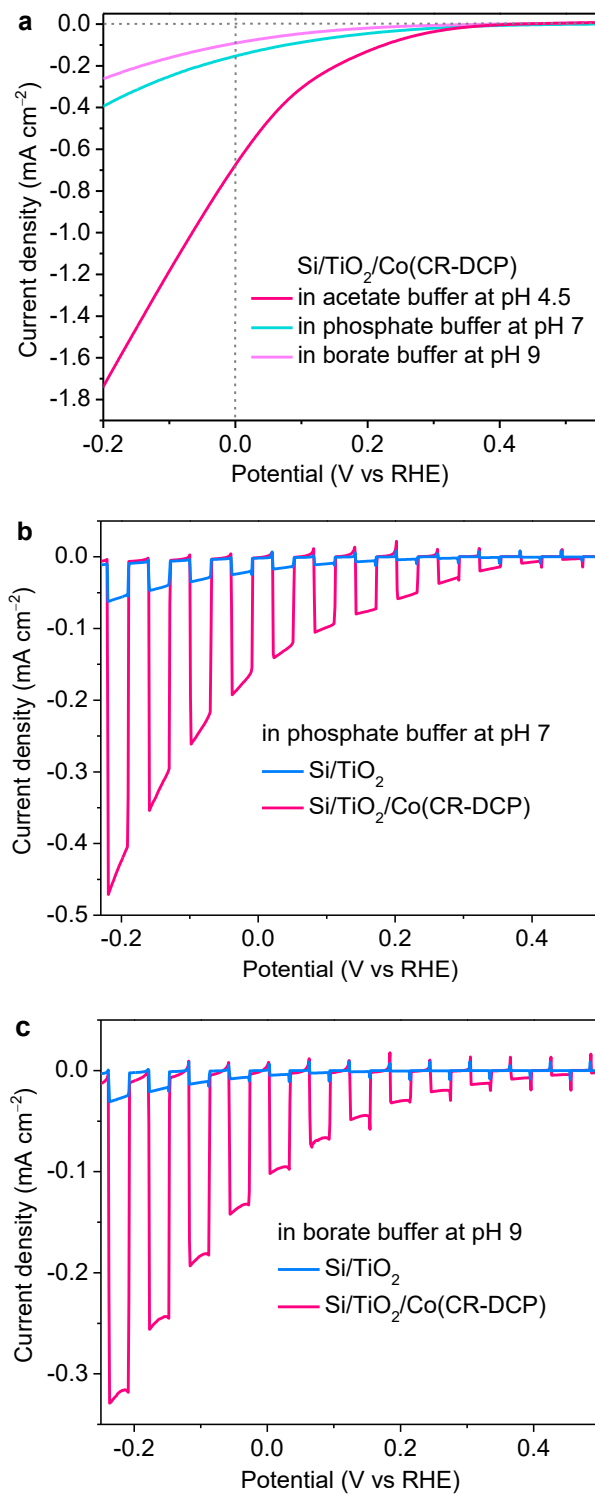

**Fig. S4** (a) LSVs of Si/TiO<sub>2</sub>/Co(CR-DCP) in different buffers (0.1 M) at pH 4.5, 7, and 9. LSVs of Si/TiO<sub>2</sub>/Co(CR-DCP) and bare Si/TiO<sub>2</sub> (b) in phosphate buffer at pH 7 and (c) in borate buffer at pH 9 under chopped illumination at a scan rate of 10 mV s<sup>-1</sup>.



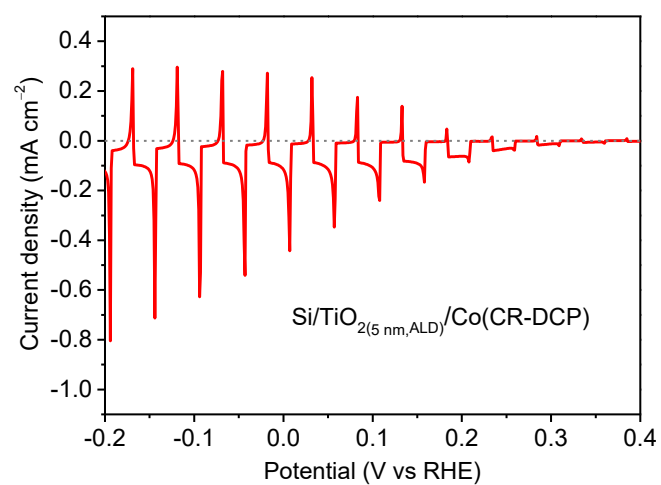

**Fig. S5** *J-V* curve of Si/TiO<sub>2</sub>(5 nm,ALD)/Co(CR-DCP) under chopped illumination at 10 mV s<sup>-1</sup>.

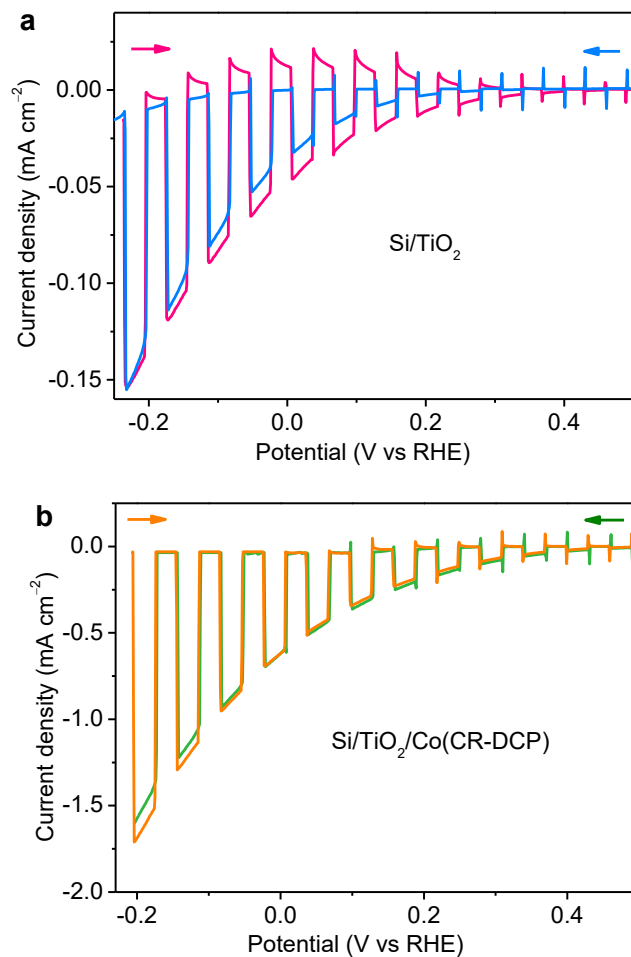

**Fig. S6**  $J$ - $V$  curves of (a) bare  $\text{Si/TiO}_2$  and (b)  $\text{Si/TiO}_2/\text{Co(CR-DCP)}$  with a 5  $\mu\text{m}$ , porous  $\text{TiO}_2$  film, scanning first in cathodic direction and then in anodic direction under chopped illumination at  $10 \text{ mV s}^{-1}$ .

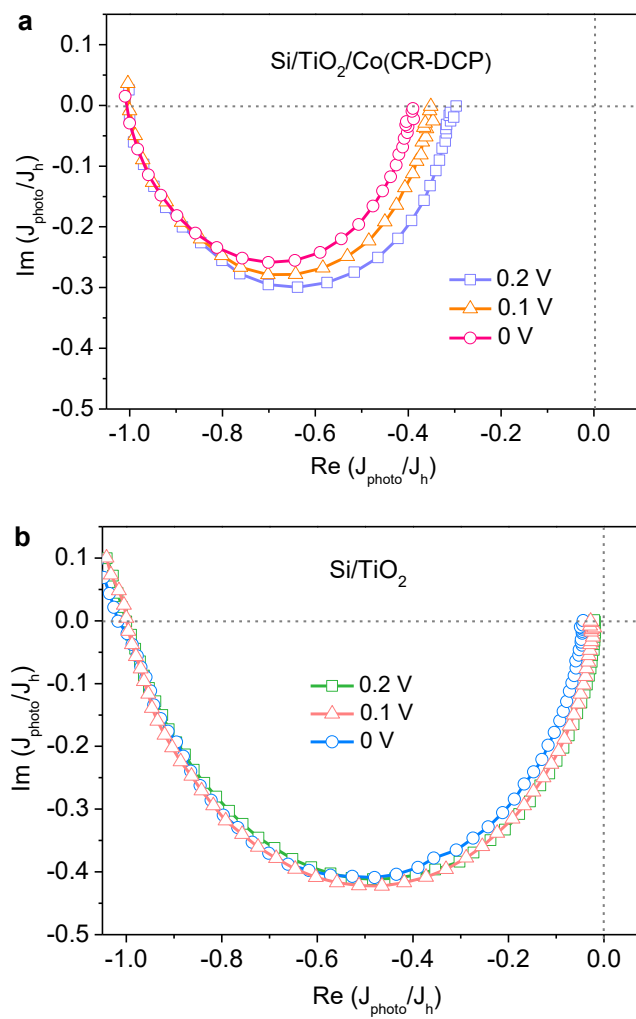

**Fig. S7** Normalized IMPS responses of (a)  $\text{Si/TiO}_2/\text{Co(CR-DCP)}$  and (b) bare  $\text{Si/TiO}_2$  at applied potentials of 0.2, 0.1, and 0 V.

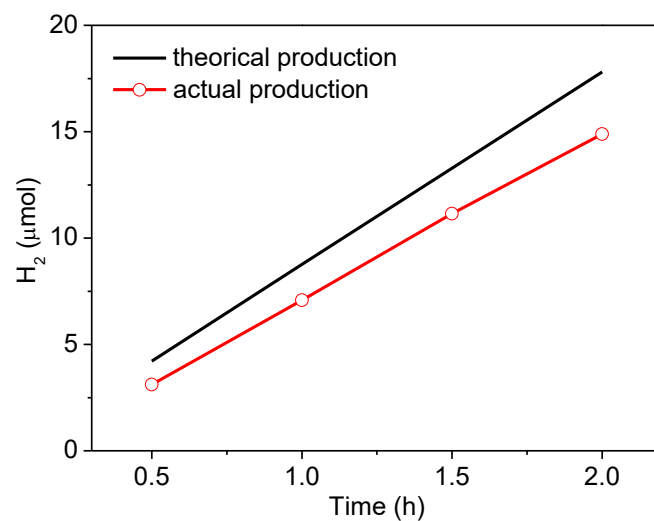

**Fig. S8** Current efficiency of Si/TiO<sub>2</sub>/Co(CR-DCP) for PEC H<sub>2</sub> production in 0.1 acetate buffer at pH 4.5 under 100 mW cm<sup>-2</sup> illumination over 2 h (a geometrical surface area of about 1 cm<sup>-2</sup> for the working electrode).

**Table S1** Previously reported non-sensitized planar semiconductor/molecular catalyst photocathodes for PEC H<sub>2</sub> production in water<sup>a</sup>

| Photocathode                                                                           | Anchor                            | Electrolyte (pH)               | $J_{(0\text{ V})}^b$<br>(mA cm <sup>-2</sup> ) | $E_{\text{on}}^c$<br>(V) | Stability <sup>d</sup><br>(loss % of photocurrent) | Ref.      |
|----------------------------------------------------------------------------------------|-----------------------------------|--------------------------------|------------------------------------------------|--------------------------|----------------------------------------------------|-----------|
| InGaP <sub>2</sub> /TiO <sub>2</sub> /cobaloxime/TiO <sub>2</sub>                      | Carboxylate                       | 0.1 M NaOH (pH 13)             | -9                                             | 0.7                      | 5% @ 0 V after 20 min                              | S3        |
| Si/TiO <sub>2</sub> /cobaloxime                                                        | Hydroxamate                       | 0.1 M borate (pH 9)            | -0.32                                          | 0.32                     | 2.9% @ 0 V after 6 h                               | S4        |
| GaP-PVP/cobaloxime                                                                     | PVP polymer grafting <sup>e</sup> | 1 M phosphate (pH 7)           | -2.7                                           | 0.76                     | 17% @ 0.17 V after 5 min                           | S5        |
| GaP-PVP/cobaloxime                                                                     | PVP polymer grafting              | 0.1 M phosphate (pH 7)         | -1.3                                           | 0.61                     | 27% @ 0 V after 60 min                             | S6        |
| GaP-PVP/cobaloxime                                                                     | PVP polymer grafting              | 0.1 M phosphate (pH 7)         | -0.92                                          | 0.72                     | ~10% @ 0.17 V after 5 min                          | S7        |
| GaP(100)-PVI/cobaloxime                                                                | PVI polymer grafting <sup>f</sup> | 0.1 M phosphate (pH 7)         | -1.2                                           | 0.58                     | n/a                                                | S8        |
| GaP(111)-PVI/cobaloxime                                                                | PVI polymer grafting              | 0.1 M phosphate (pH 7)         | -0.89                                          | 0.65                     | 13% @ 0 V after 55 min                             | S8        |
| GaP/cobalt porphyrin                                                                   | Carbon chain                      | 0.1 M phosphate (pH 7)         | -1.31                                          | 0.55                     | < 10% @ 0 V after 4 h                              | S9        |
| Au/InP/Fe <sub>2</sub> S <sub>2</sub> (CO) <sub>6</sub> <sup>g</sup>                   | Direct S coordination             | 0.1 M NaBF <sub>4</sub> (pH 7) | -4.5×10 <sup>4</sup>                           | 0.51                     | n/a                                                | S10       |
| Si/ALD-TiO <sub>2</sub> /SC-TiO <sub>2</sub> /CoC <sub>11</sub> P/ALD-TiO <sub>2</sub> | Phosphonate                       | 1 M phosphate (pH 7)           | -1.25                                          | 0.47                     | 24% @ 0 V after 1 h                                | S11       |
| Si/ALD-TiO <sub>2</sub> /SC-TiO <sub>2</sub> /CoC <sub>11</sub> P                      | Phosphonate                       | 1 M phosphate (pH 7)           | -0.5                                           | 0.09                     | rapid decrease @ 0 V in 2 h                        | S11       |
| CuFe <sub>x</sub> O <sub>y</sub> /cobaloxime                                           | DCP                               | 0.2 M phosphate (pH 6.7)       | —                                              | 0.86                     | rapid decrease @ 0.4 V<br>in 8 min                 | S12       |
| GaP-PVP/cobaloxime                                                                     | PVP polymer grafting              | 0.1 M acetate (pH 4.5)         | -1.10                                          | 0.5                      | 18 @ -0.12 V after 15 min                          | S13       |
| Si/mesoTiO <sub>2</sub> /DuBois' Ni catalyst                                           | Phosphonate                       | 0.1 M acetate (pH 4.5)         | -0.34                                          | 0.4                      | 50 @ 0 V after 8 h                                 | S2        |
| Si/mesoTiO <sub>2</sub> /cobaloxime                                                    | Phosphonate                       | 0.1 M acetate (pH 4.5)         | -0.33                                          | ~ 0.36                   | 100 @ 0 V after 0.5 h                              | S2        |
| Si/mesoTiO <sub>2</sub> /Pt                                                            | —                                 | 0.1 M acetate (pH 4.5)         | -0.43                                          | ~ 0.4                    | Steady @ 0 V over 24 h                             | S2        |
| P3HT:PCBM/cobaloxime                                                                   | By click reaction                 | 0.1 M acetate (pH 4.5)         | -0.002                                         | n/a                      | n/a                                                | S14       |
| Si/TiO <sub>2</sub> /Co(CR-DCP)                                                        | DCP                               | 0.1 M acetate (pH 4.5)         | -0.682                                         | 0.37                     | Steady @ 0 V over 10 h                             | This work |

<sup>a</sup>Illumination intensity: 100 mW cm<sup>-2</sup>. <sup>b</sup>LSV measurements. <sup>c</sup>All potentials are versus RHE. <sup>d</sup>Chronoamperometry measurements. <sup>e</sup>PVP = polyvinylpyridine. <sup>f</sup>PVI = polyvinylimidazole. <sup>g</sup>Under illumination of 395 nm LED.

**Table S2** Kinetic data obtained from IMPS responses of photoelectrodes

| Photocathode                    | Potential<br>(V) | $k_{\text{trans}}$<br>(s <sup>-1</sup> ) | $k_{\text{rec}}$<br>(s <sup>-1</sup> ) | $k_{\text{trans}}/(k_{\text{trans}} + k_{\text{rec}})$<br>(%) |
|---------------------------------|------------------|------------------------------------------|----------------------------------------|---------------------------------------------------------------|
| Si/TiO <sub>2</sub> /Co(CR-DCP) | 0                | 1293                                     | 2022                                   | 39                                                            |
|                                 | 0.1              | 1194                                     | 2121                                   | 36                                                            |
|                                 | 0.2              | 1160                                     | 2154                                   | 35                                                            |
| Si/TiO <sub>2</sub>             | 0                | 125                                      | 4644                                   | 2.6                                                           |
|                                 | 0.1              | 69                                       | 4859                                   | 1.7                                                           |
|                                 | 0.2              | 45                                       | 4918                                   | 0.9                                                           |

**Table S3** Quantitative data obtained from ICP-OES analysis for the amounts of the immobilized catalyst on the surface of Si/TiO<sub>2</sub> electrodes and the Co<sup>n+</sup> species in the electrolytes before and after 10 h CPP experiments

| Photocathode                                | Amount of immobilized catalyst on electrode surface (nmol cm <sup>-2</sup> ) | Amount of Co <sup>n+</sup> species in electrolyte (nmol mL <sup>-1</sup> ) |
|---------------------------------------------|------------------------------------------------------------------------------|----------------------------------------------------------------------------|
| Si/TiO <sub>2</sub> /Co(CR-DCP) before used | 37.8 ± 5.8                                                                   | 0.12 ± 0.02                                                                |
| Si/TiO <sub>2</sub> /Co(CR-DCP) after used  | 27.4 ± 6.4                                                                   | 0.26 ± 0.01                                                                |

## References

- S1 C. Nie, W. Ni, L. Gong, J. Jiang, J. Wang and M. Wang, *J. Mater. Chem. A*, 2019, **7**, 27432–27440.
- S2 J. J. Leung, J. Warnan, D. H. Nam, J. Z. Zhang, J. Willkomm and E. Reisner, *Chem. Sci.*, 2017, **8**, 5172–5180.
- S3 J. Gu, Y. Yan, J. L. Young, K. X. Steirer, N. R. Neale and J. A. Turner, *Nat. Mater.*, 2016, **15**, 456–460.
- S4 L. Gong, H. Yin, C. Nie, X. Sun, X. Wang and M. Wang, *ACS Appl. Mater. Interfaces*, 2019, **11**, 34010–34019.
- S5 A. Krawicz, J. Yang, E. Anzenberg, J. Yano, I. D. Sharp and G. F. Moore, *J. Am. Chem. Soc.*, 2013, **135**, 11861–11868.
- S6 A. M. Beiler, D. Khusnutdinova, S. I. Jacob and G. F. Moore, *Ind. Eng. Chem. Res.*, 2016, **55**, 5306–5314.
- S7 A. Krawicz, D. Cedeno and G. F. Moore, *Phys. Chem. Chem. Phys.*, 2014, **16**, 15818–15824.
- S8 A. M. Beiler, D. Khusnutdinova, S. I. Jacob and G. F. Moore, *ACS Appl. Mater. Interfaces*, 2016, **8**, 10038–10047.
- S9 D. Khusnutdinova, A. M. Beiler, B. L. Wadsworth, S. I. Jacob and G. F. Moore, *Chem. Sci.*, 2017, **8**, 253–259.
- S10 T. Nann, S. K. Ibrahim, P. M. Woi, S. Xu, J. Ziegler and C. J. Pickett, *Angew. Chem., Int. Ed.*, 2010, **49**, 1574–1577.
- S11 S. Chandrasekaran, N. Kaeffer, L. Cagnon, D. Aldakov, J. Fize, G. Nonglaton, F. Baleras, P. Mailley and V. Artero, *Chem. Sci.*, 2019, **10**, 4469–4475.
- S12 C. Tapia, E. Bellet-Amalric, D. Aldakov, F. Boudoire, K. Sivula, L. Cagnon and V. Artero, *Green Chem.*, 2020, **22**, 3141–3149.
- S13 D. Cedeno, A. Krawicz, P. Doak, M. Yu, J. B. Neaton and G. F. Moore, *J. Phys. Chem. Lett.*, 2014, **5**, 3222–3226.
- S14 Y. Chen, H. Chen and H. Tian, *Chem. Commun.*, 2015, **51**, 11508–11511.
